# Supplementary material
Source: HighWire-hosted journal article supplement (https://www.cmaj.ca/highwire/filestream/59170/field_highwire_adjunct_files/0/five-papponka-1-at.pdf)
Supplement: five-papponka-1-at.pdf [file five-papponka-1-at.pdf]

## Appendix 1: References

1. Dickinson JA, Stankiewicz A, Popadiuk C, et al. Reduced cervical cancer incidence and mortality in Canada: national data from 1932 to 2006. *BMC Public Health* 2012;12:992.
2. Dickinson J, Tsakonas E, et al.; Canadian Task Force on Preventive Health Care. Recommendations on screening for cervical cancer. *CMAJ* 2013;185:35-45.
3. Schiffman M, Castle PE. The promise of global cervical-cancer prevention. *N Engl J Med* 2005;353:2101-4.
4. CMA's Forum on General and Family Practice Issues and College of Family Physicians of Canada. Five things physicians and patients should question. In: *Choosing Wisely Canada* [website]. Available: [www.choosingwiselycanada.org/recommendations/cmas-forum-on-general-and-family-practice-issues-and-college-of-family-physicians-of-canada/](http://www.choosingwiselycanada.org/recommendations/cmas-forum-on-general-and-family-practice-issues-and-college-of-family-physicians-of-canada/) (accessed 2014 Oct. 27).
5. Ronco G, Dillner J, Elfström KM, et al. Efficacy of HPV-based screening for prevention of invasive cervical cancer: follow-up of four European randomised controlled trials. *Lancet* 2014;383:524-32.
6. Schiffman M, Castle PE, Jeronimo J, et al. Human papillomavirus and cervical cancer. *Lancet* 2007;370:890-907.
7. Bloomfield HE, Olson A, Greer N, et al. Screening pelvic examinations in asymptomatic, average-risk adult women: an evidence report for a clinical practice guideline from the American College of Physicians. *Ann Intern Med* 2014;161:46-53.
8. Israelson D. Jessica Ching: Entrepreneur redevelops one of life's scariest tests. *Globe and Mail* [Toronto] 2014 Aug. 29. Available: [www.theglobeandmail.com/report-on-business/innovators-at-work/entrepreneur-redevelops-one-of-lifes-scariest-tests/article20275955/](http://www.theglobeandmail.com/report-on-business/innovators-at-work/entrepreneur-redevelops-one-of-lifes-scariest-tests/article20275955/) (accessed 2014 Oct. 28).
